# Supplementary figures and images for: Effects of Perfluorooctanoic Acid on Gut Microbiota and Microbial Metabolites in C57BL/6J Mice
Source: MDPI journal article supplement (doi:10.3390/metabo13060707), 2023-05-30

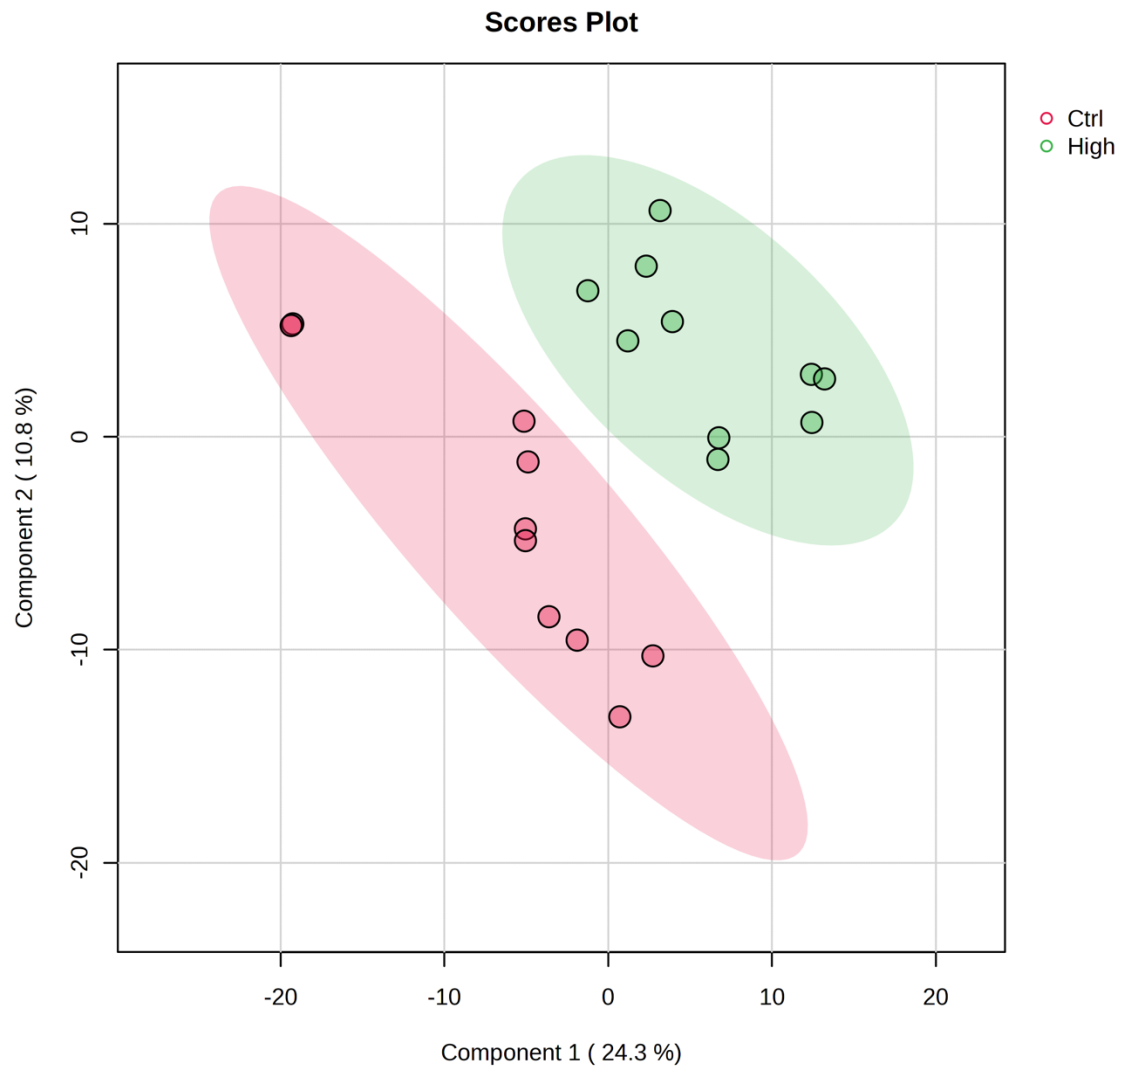

Figure S1. PLS-DA plot for fecal metabolites

Supplement: s1 [file s1]
